# Supplementary material for: Prostate cancer treated with brachytherapy; an exploratory study of dose-dependent biomarkers and quality of life
Source: Springer Nature journal article supplement (doi:10.1186/s13014-017-0792-1), 2017-03-14

Additional Figure 2

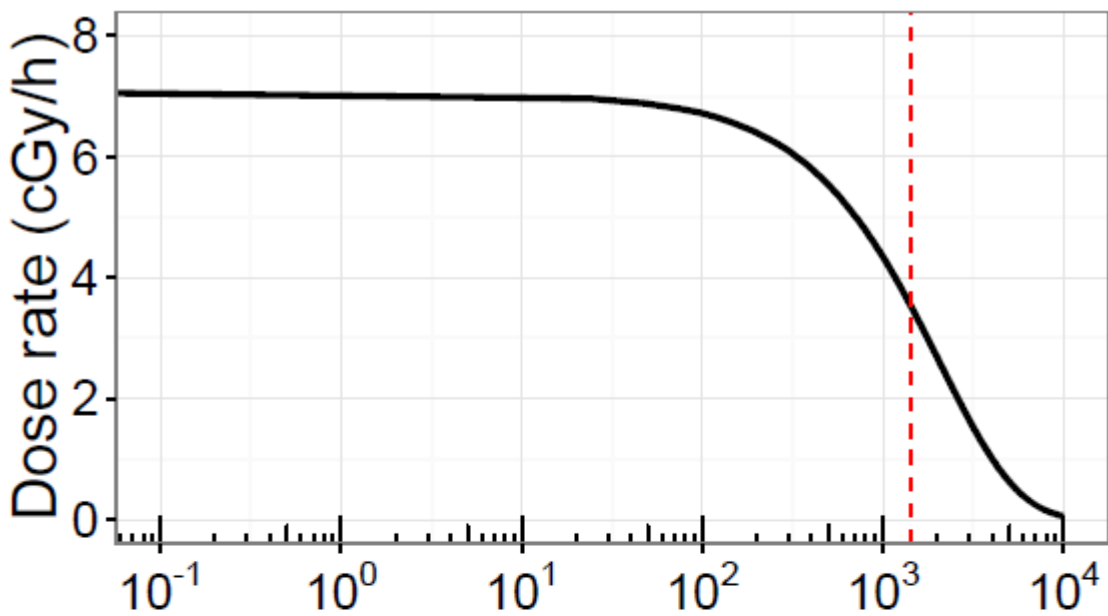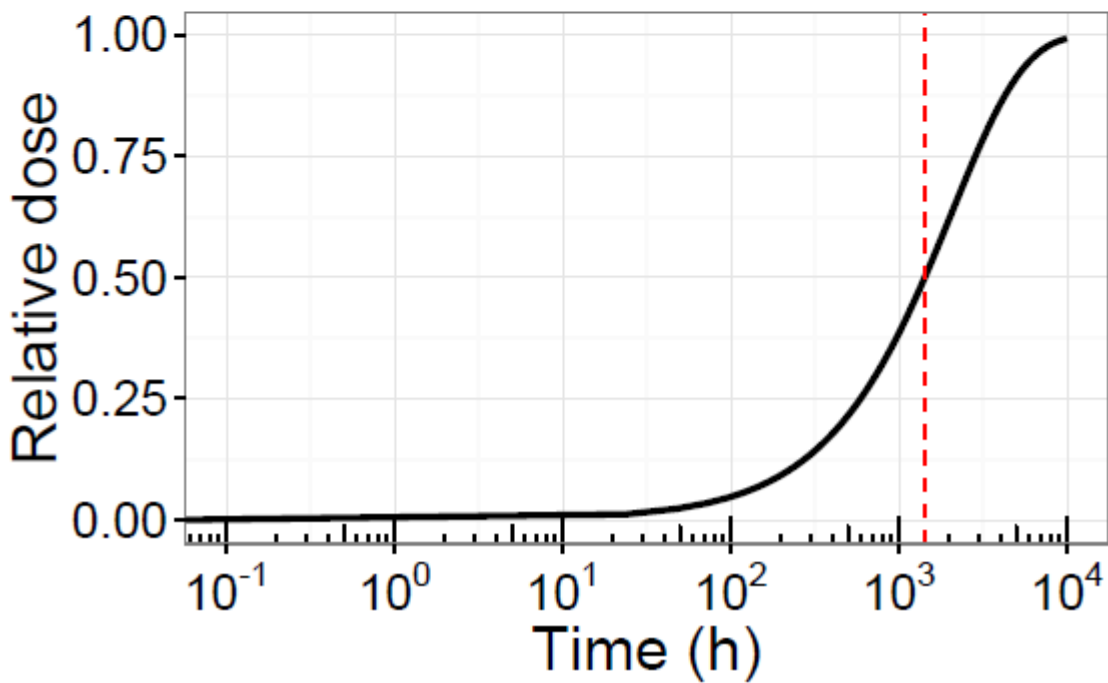

Supplement: MOESM2 [file 12139026]
